# Supplementary material for: Polar zinc oxide surface in electrolyte solutions: an atomic view of reconstruction, hydration and surface states
Source: Royal Society of Chemistry journal article supplement (doi:10.1039/d1cp02371c), 2021-01-01
Supplement: d1cp02371c1.pdf [file d1cp02371c1.pdf]

## Supplementary Information

### **Polar zinc oxide surface in electrolyte solutions; an atomic view of reconstruction, hydration and surface states**

Yudai Samejima<sup>a</sup>, Naritaka Kobayashi<sup>\*a</sup> and Seiichiro Nakabayashi<sup>\*a</sup>

<sup>a</sup>Graduate School of Science and Engineering, Saitama University, Shimo-okubo 255, Sakura-ku, Saitama 338-8570, Japan

\*E-mail: [naritaka@mail.saitama-u.ac.jp](mailto:naritaka@mail.saitama-u.ac.jp) (Naritaka Kobayashi)

\*E-mail: [sei@chem.saitama-u.ac.jp](mailto:sei@chem.saitama-u.ac.jp) (Seiichiro Nakabayashi)

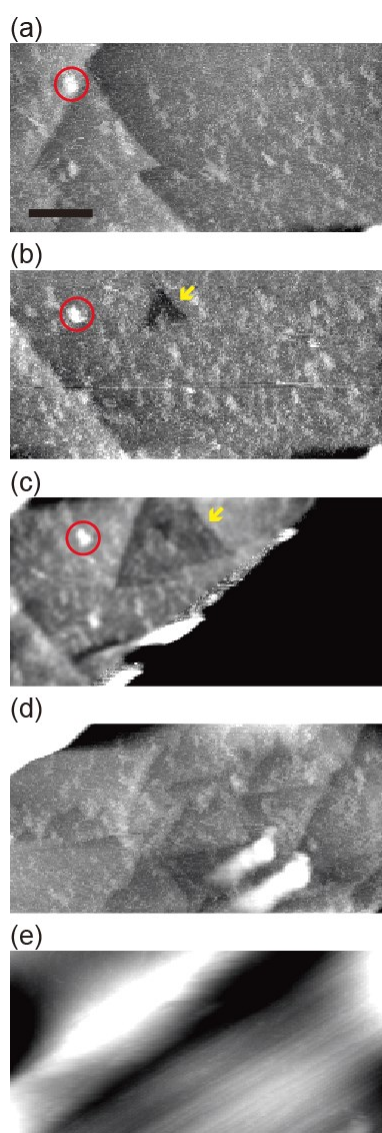

**Fig. S1.** Successive AFM images of the Zn-ZnO(0001) surface taken in 10 mM HCl solution of pH 2.0. The lower right part of (c) is darkened to highlight the equilateral triangular pit indicated by the yellow arrow. A marker is indicated by the red circles. Image size is 300 nm  $\times$  150 nm (scale bar = 50 nm).

**Table S1.** The ratio of the net step line length at each potential. Scale bar = 20 nm

| Potential                     | +0.3 V vs. SEC ( $E_{OC}$ )                                                       | -1.2 V vs. SEC                                                                     | +0.3 V vs. SEC ( $E_{OC}$ )<br>(returned)                                           |
|-------------------------------|-----------------------------------------------------------------------------------|------------------------------------------------------------------------------------|-------------------------------------------------------------------------------------|
| AFM image                     | 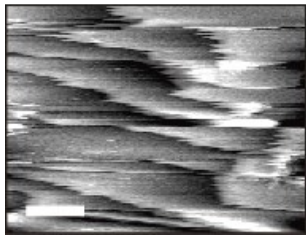 |  |  |
| Ratio of net step line length | 25                                                                                | : 7                                                                                | : 21                                                                                |
